# Supplementary material for: Theoretical and experimental study of low band gap polymers for organic solar cells
Source: Royal Society of Chemistry journal article supplement (doi:10.1039/c2cp40170c), 2012-01-01

## Supporting Information

Fig. S1: HOMO-LUMO gaps obtained with B3LYP as a function of reciprocal chain length in oligomers of P3HT, POPT and POPOT. This information is available free of charge via the Internet at <http://pubs.acs.org>.

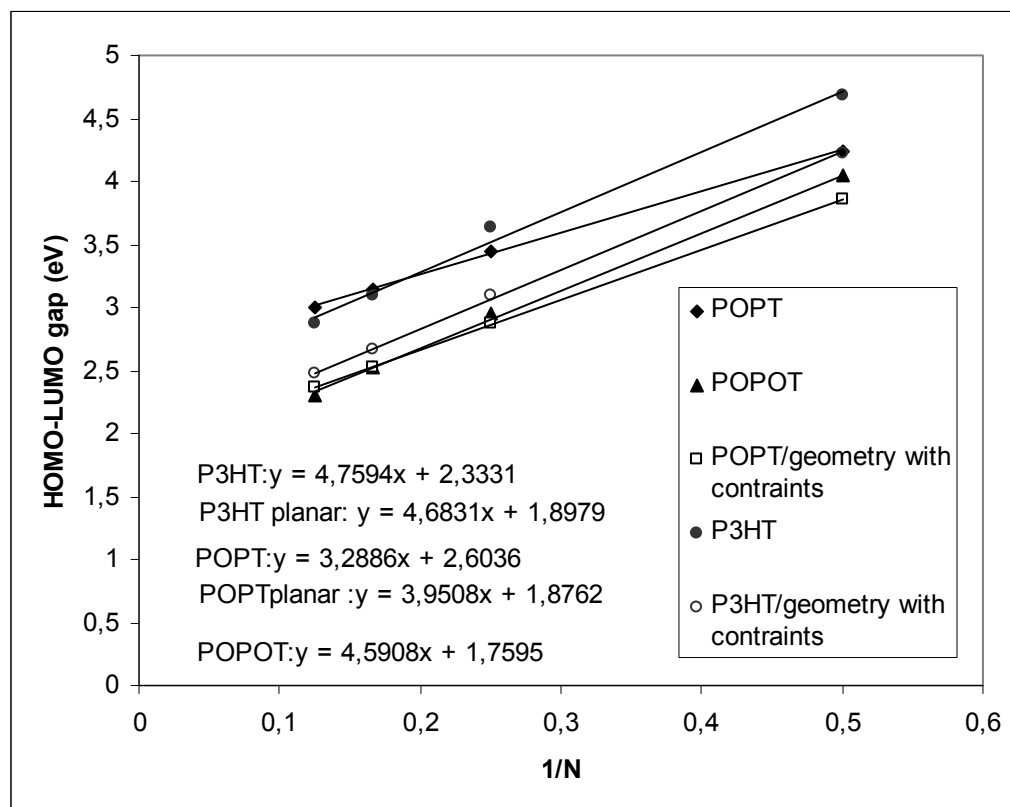

Supplement: c2cp40170c.pdf [file c2cp40170c.pdf]
